# Supplementary material for: Starch biosynthesis in rice endosperm requires the presence of either starch synthase I or IIIa
Source: PubMed Central journal article supplement — J Exp Bot. 2011 Jul 5;62(14):4819–31. doi: 10.1093/jxb/err125 (PMC3192996; doi:10.1093/jxb/err125), 2011-07-05
Supplement: supp_err125_00057539-file001.pdf [file supp_err125_00057539-file001.pdf]

# Starch Biosynthesis in Rice Endosperm Requires the Presence of Either Starch Synthase I or IIIa

*Naoko Fujita<sup>1</sup>, Rui Satoh, Aki Hayashi, Momoko Kodama, Rumiko Itoh, Satomi Aihara, Yasunori Nakamura*

## Supplementary Material

**Figure S1.** Pleiotropic effect of the deficiency or reduction of SSI or SSIIIa activity on SS, DBE, BE and PHO activity in the TO line, WO line, and *ss1<sup>L</sup>ss1<sup>L</sup>/ss3ass3a*, *ss1* mutant ( $\Delta$ SSI, *e7, i2-1*), *ss3a* mutant ( $\Delta$ SSIIIa, *e1*), and wild type Nipponbare when measured by native-PAGE/activity staining of their developing endosperms. SSIIIa and SSI (SS activity staining), ISA (isoamylase), PUL (pullulanase), PHO (phosphorylase) (DBE activity staining), and BEI, BEIIa, BEIIb and PHO (BE activity staining) are indicated by arrowheads. Nip: Nipponbare.

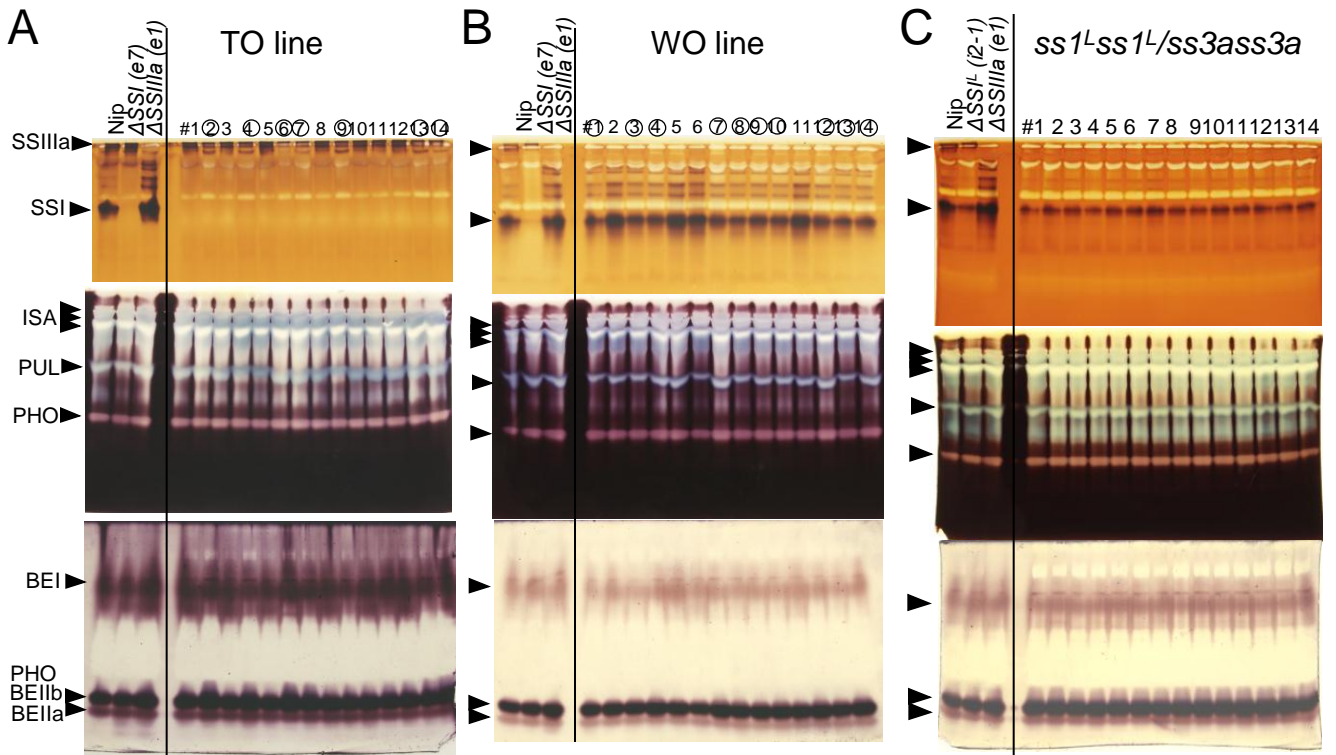

Fig. S1

| <b>Suppl. table 1</b> Segregation of F <sub>2</sub> and F <sub>3</sub> to F <sub>5</sub> seeds of the TO and WO lines. |                 |                       |                  |                  |                    |                     |                   |
|------------------------------------------------------------------------------------------------------------------------|-----------------|-----------------------|------------------|------------------|--------------------|---------------------|-------------------|
| <b>F<sub>2</sub> seeds</b>                                                                                             |                 |                       |                  |                  |                    |                     |                   |
|                                                                                                                        |                 | Translucent           | White core       | Opaque           | Empty <sup>a</sup> | Others <sup>b</sup> | Total             |
| F <sub>2</sub> seeds ('04)                                                                                             | #1 <sup>c</sup> | 115 (36) <sup>d</sup> | 39 (12)          | 33 (10)          | 80 (25)            | 54 (17)             | 321 (100)         |
|                                                                                                                        | #2              | 92 (43)               | 26 (12)          | 28 (13)          | 39 (18)            | 28 (13)             | 213 (100)         |
| <b>Total</b>                                                                                                           |                 | <b>207 (39)</b>       | <b>65 (12)</b>   | <b>61 (11)</b>   | <b>119 (22)</b>    | <b>82 (15)</b>      | <b>534 (100)</b>  |
| <b>F<sub>3</sub> to F<sub>5</sub> seeds of TO line</b>                                                                 |                 |                       |                  |                  |                    |                     |                   |
|                                                                                                                        |                 | Translucent           | White core       | Opaque           | Empty              | Others              | Total             |
| F <sub>3</sub> seeds ('06)                                                                                             | #1              | 309 (34)              | 0 (0)            | 257 (28)         | 322 (35)           | 29 (3)              | 917 (100)         |
|                                                                                                                        | #2              | 298 (31)              | 0 (0)            | 340 (36)         | 292 (31)           | 21 (2)              | 951 (100)         |
|                                                                                                                        | #3              | 176 (37)              | 0 (0)            | 179 (37)         | 126 (26)           | 0 (0)               | 481 (100)         |
|                                                                                                                        | #4              | 335 (38)              | 0 (0)            | 334 (38)         | 212 (24)           | 2 (0)               | 883 (100)         |
|                                                                                                                        | #5              | 378 (34)              | 0 (0)            | 304 (28)         | 323 (29)           | 98 (9)              | 1103 (100)        |
|                                                                                                                        | #6              | 602 (47)              | 0 (0)            | 474 (37)         | 217 (17)           | 0 (0)               | 1293 (100)        |
| <b>Total</b>                                                                                                           |                 | <b>2098 (37)</b>      | <b>0 (0)</b>     | <b>1888 (34)</b> | <b>1492 (27)</b>   | <b>150 (3)</b>      | <b>5628 (100)</b> |
| F <sub>4</sub> seeds ('07)                                                                                             | #1              | 539 (43)              | 0 (0)            | 505 (40)         | 172 (14)           | 50 (4)              | 1266 (100)        |
|                                                                                                                        | #2              | 507 (45)              | 0 (0)            | 464 (41)         | 112 (10)           | 54 (5)              | 1137 (100)        |
|                                                                                                                        | #3              | 229 (37)              | 0 (0)            | 211 (34)         | 130 (21)           | 55 (9)              | 625 (100)         |
| <b>Total</b>                                                                                                           |                 | <b>1275 (42)</b>      | <b>0 (0)</b>     | <b>1180 (39)</b> | <b>414 (14)</b>    | <b>159 (5)</b>      | <b>3028 (100)</b> |
| F <sub>5</sub> seeds ('08)                                                                                             | #1              | 160 (43)              | 0 (0)            | 116 (31)         | 82 (22)            | 15 (4)              | 373 (100)         |
|                                                                                                                        | #2              | 61 (29)               | 0 (0)            | 69 (33)          | 77 (37)            | 1 (0)               | 208 (100)         |
|                                                                                                                        | #3              | 82 (27)               | 0 (0)            | 79 (26)          | 141 (46)           | 6 (2)               | 308 (100)         |
|                                                                                                                        | #4              | 102 (36)              | 0 (0)            | 86 (31)          | 89 (32)            | 3 (1)               | 280 (100)         |
| <b>Total</b>                                                                                                           |                 | <b>405 (35)</b>       | <b>0 (0)</b>     | <b>350 (30)</b>  | <b>389 (33)</b>    | <b>25 (2)</b>       | <b>1169 (100)</b> |
| <b>F<sub>3</sub> to F<sub>4</sub> seeds of WO line</b>                                                                 |                 |                       |                  |                  |                    |                     |                   |
|                                                                                                                        |                 | Translucent           | White core       | Opaque           | Empty              | Others              | Total             |
| F <sub>3</sub> seeds ('07)                                                                                             | #1              | 0 (0)                 | 419 (36)         | 386 (33)         | 305 (26)           | 51 (4)              | 1161 (100)        |
|                                                                                                                        | #2              | 0 (0)                 | 342 (30)         | 354 (31)         | 383 (33)           | 79 (7)              | 1158 (100)        |
|                                                                                                                        | #3              | 0 (0)                 | 341 (30)         | 366 (32)         | 364 (32)           | 70 (6)              | 1141 (100)        |
| <b>Total</b>                                                                                                           |                 | <b>0 (0)</b>          | <b>1102 (32)</b> | <b>1106 (32)</b> | <b>1052 (30)</b>   | <b>200 (6)</b>      | <b>3460 (100)</b> |
| F <sub>4</sub> seeds ('08)                                                                                             | #1              | 0 (0)                 | 77 (25)          | 78 (25)          | 148 (47)           | 11 (4)              | 314 (100)         |
|                                                                                                                        | #2              | 0 (0)                 | 88 (29)          | 77 (25)          | 118 (39)           | 21 (7)              | 304 (100)         |
|                                                                                                                        | #3              | 0 (0)                 | 41 (21)          | 59 (30)          | 92 (46)            | 7 (4)               | 199 (100)         |
|                                                                                                                        | #4              | 0 (0)                 | 64 (17)          | 88 (23)          | 233 (60)           | 1 (0)               | 386 (100)         |
|                                                                                                                        | #5              | 0 (0)                 | 69 (26)          | 86 (32)          | 109 (41)           | 4 (1)               | 268 (100)         |
| <b>Total</b>                                                                                                           |                 | <b>0 (0)</b>          | <b>339 (23)</b>  | <b>388 (26)</b>  | <b>700 (48)</b>    | <b>44 (3)</b>       | <b>1471 (100)</b> |
| <sup>a</sup> No endosperm, but have a hull.                                                                            |                 |                       |                  |                  |                    |                     |                   |
| <sup>b</sup> Unidentified seeds.                                                                                       |                 |                       |                  |                  |                    |                     |                   |
| <sup>c</sup> Number of Individual rice plants.                                                                         |                 |                       |                  |                  |                    |                     |                   |
| <sup>d</sup> Percent of total number of seeds.                                                                         |                 |                       |                  |                  |                    |                     |                   |
